# Supplementary material
Source: publisher site journal article supplement (https://www.dovepress.com/article/295526)
Supplement: Supplementary file 1 [file get_supplementary_file.php]

| **Supplemental Table 1: Treatment Algorithms used to Identify Guideline-Concordant Initial Treatment as per the NCCN Guidelines for HER2-Negative Metastatic Breast Cancer by Hormone Receptor Status** | | | |
| --- | --- | --- | --- |
|  |  |  |  |
| HR-Negative Cases | a | Chemotherapy | - Anthracyclines (Doxorubicin, Epirubicin, OR Pegylated liposomal doxorubicin) OR - Taxanes (Paclitaxel, Docetaxel, OR Albumin-bound paclitaxel) OR - Antimetabolites (Capecitabine OR Gemcitabine) OR - Other microtubule inhibitors (Vinorelbine OR Eribulin*) OR - Other agents (Cyclophosphomide, Carboplatin, Mitoxantrone, Cisplatin, Etoposide, Vinblastine, Fluorouracil Cl, OR Ixabepilone) - (Cyclophosphamide+Doxorubicin+Fluorouracil) OR - (Fluorouracil+Epirubicin+Cyclophosphamide) OR - (Doxorubicin+Cyclophosphamide) OR - (Epirubicin+Cyclophosphamide) OR - (Cyclophosphamide+Methotrexate+Fluorouracil) OR - (Docetaxel+Capecitabine) OR - (Gemcitabine+Paclitaxel) OR - (Gemcitabine+Carboplatin) OR - (Paclitaxel+Bevacizumab) |
|  |  |  |  |
| HR-Positive Cases | a | Aromatase inhibitors (Anastrozole OR Letrozole OR Exemestane) OR |  |
|  | b | Selective endocrine receptor modulators (Tamoxifen OR Toremifene) OR |  |
|  | c | Selective endocrine receptor down-regulator (Fulvestrant) OR |  |
|  | d | Chemotherapy | - Anthracyclines (Doxorubicin, Epirubicin, OR Pegylated liposomal doxorubicin) OR - Taxanes (Paclitaxel, Docetaxel, OR Albumin-bound paclitaxel) OR - Antimetabolites (Capecitabine OR Gemcitabine) OR - Other microtubule inhibitors (Vinorelbine OR Eribulin*) OR - Other agents (Cyclophosphomide, Carboplatin, Mitoxantrone, Cisplatin, Etoposide, Vinblastine, Fluorouracil Cl, OR Ixabepilone) - (Cyclophosphamide+Doxorubicin+Fluorouracil) OR - (Fluorouracil+Epirubicin+Cyclophosphamide) OR - (Doxorubicin+Cyclophosphamide) OR - (Epirubicin+Cyclophosphamide) OR - (Cyclophosphamide+Methotrexate+Fluorouracil) OR - (Docetaxel+Capecitabine) OR - (Gemcitabine+Paclitaxel) OR - (Gemcitabine+Carboplatin) OR - (Paclitaxel+Bevacizumab) |
|  |  |  |  |

HR: Hormone receptor

*Eribulin added in 2012
